# Supplementary material for: Impact of the dry day definition on Mediterranean extreme dry spells analysis
Source: Copernicus journal article supplement (doi:10.5194/nhess-2019-31), 2019-02-20
Supplement: Supplementary file [file nhess-2019-31-AC4-supplement.pdf]

1 Impact of the dry day definition on Mediterranean extreme dry  
2 spells analysis

3

4 Pauline Rivoire<sup>1</sup>

5 Yves Trambly<sup>1</sup>

6 Luc Neppel<sup>1</sup>

7 Elke Hertig<sup>2</sup>

8 Sergio M. Vicente-Serrano<sup>3</sup>

9

10

11

12 <sup>1</sup> HSM (Univ. Montpellier, CNRS, IRD), Montpellier, France

13 <sup>2</sup> Institute of Geography, University of Augsburg, Germany

14 <sup>3</sup> Instituto Pirenaico de Ecologia (IPE-CSIC), Campus de Aula Dei, Zaragoza, Spain

15

16

17

18

19

20

21

22

23

24

25

26 **Revised manuscript, 31/05/2019**

27

28

29

30

31

32

33 **ABSTRACT**

34

35 To define a dry day, the most common approach is to identify a fixed threshold below which  
36 precipitation is considered equivalent to zero. This fixed threshold is usually set to account for  
37 measurements errors and also for precipitation losses due to the atmospheric evaporation  
38 demand. Yet, this threshold could vary in time according to the seasonal cycle but also in the  
39 context of long-term trends such as the increase of temperature due to climate change. In this  
40 study, we compare extreme dry spells defined either with a fixed threshold for a dry day (1  
41 mm) or with a time-varying threshold estimated from reference evapotranspiration ( $ET_0$ ) for a  
42 large data base of 160 rain gauges covering large parts of the Mediterranean basin. Results  
43 indicated positives trends in  $ET_0$  in particular during summer months (June, July and August).  
44 However, these trends do not imply longer dry spells since the daily precipitation intensities  
45 remains higher than the increase in the evaporative demand. Results also indicated a seasonal  
46 behavior: in winter the distribution of extreme dry spells is similar when considering a fixed  
47 threshold (1 mm) or a time-varying threshold defined with  $ET_0$ . However, during summer, the  
48 extreme dry spell durations estimated with a 1 mm threshold are strongly underestimated by  
49 comparison with extreme dry spells computed with  $ET_0$ . We stress the need to account for the  
50 atmospheric evaporative demand instead of using fixed thresholds to define a dry day when  
51 analyzing dry spells, in particular with respect to agricultural impacts.

52

53

54

55

56

57

58

59

60 **Keywords:**

61

62 Extremes, dry spell, Mediterranean, reference evapotranspiration, atmospheric evaporative  
63 demand

64

65

66

67 **1. INTRODUCTION**

68

69 The Mediterranean region is affected by severe droughts episodes, linked to the strong inter-  
70 annual variability of precipitation patterns (Mariotti and Dell'Aquila, 2012). These droughts  
71 can impact agricultural production (Páscoa et al., 2017), and water resources (Lorenzo-Lacruz  
72 et al., 2013), in particular when occurring during the (wet) winter season (Raymond et al.,  
73 2016). In addition, several studies indicate a tendency toward a warming and drying of the  
74 Mediterranean region that could intensify in the future according to climate projections  
75 (Hoerling et al. 2012, Hertig and Trambly 2017, Naumann et al. 2018).

76

77 There are different methods to analyze droughts, by means of drought indices (Mishra and  
78 Singh, 2010, Mukherjee et al., 2018) but also by explicitly modelling the frequency/duration  
79 of dry spells (Vicente-Serrano and Beguería-Portugués, 2003). A dry spell is meteorologically  
80 defined as a sequence of consecutive dry days with no precipitation, or precipitation below a  
81 certain threshold. Although dry spells cannot be used to determine drought severity, as a  
82 consequence of the climatological differences, they are highly useful to assess spatial  
83 differences in the drought hazard probability (Lana et al., 2006), but also to determine  
84 possible trends associated to climate change (Raymond et al., 2016). Moreover, analyses  
85 based on dry spells have usually been used for agricultural management purposes in different  
86 regions of the world (Sivakumar, 1992, Lana et al., 2006, Mathugama and Peiris, 2011,  
87 Raymond et al., 2016).

88

89 Several authors analyzed long dry spells, considering different precipitation thresholds (1 to  
90 10 mm/day), but fixed for the whole observation period (Vicente-Serrano and Beguería-  
91 Portugués, 2003, Lana et al., 2006, Serra et al., 2016, Raymond et al., 2016, 2017, Trambly  
92 and Hertig, 2018). About the threshold considered for a "dry" day it is usual to use values  
93 higher than zero to account for measurements errors or very little amounts of rain that are not  
94 available for plants or water resources, due to interception or/and direct evaporation  
95 (Douguedroit, 1987, Raymond et al., 2016). In a climate change context it is also used to  
96 reduce the typical "drizzle effect" of dynamical models which results in too many low  
97 precipitation amounts compared to observations. The determination of this threshold, noted  
98 Daily Rainfall Threshold (DRT), can be a key issue to relate dry spells risk to impacts in  
99 different sectors. Douguedroit (1987) defined a threshold of 1 mm of precipitation in  
100 environments with a Mediterranean climate, because below this amount the rainfall is

101 generally not absorbed by soils under conditions of high evapotranspiration. It is the most  
102 widely used daily rainfall threshold (Polade et al., 2014, Raymond et al., 2016, 2017), even  
103 though this arbitrary value has not been supported by any experimental study.

104

105 However, fixed thresholds are not representative of real ground conditions, since the  
106 evaporation varies throughout the year and for different locations. The atmospheric  
107 evaporative demand (AED) can strongly modulate the net precipitation that is available for  
108 the plants, affecting water stress levels by plants and crops (Allen et al., 2015; Anderegg et al.,  
109 2016; Lobell et al., 2015; Lobell and Field, 2007). It is expected that based on precipitation  
110 records, dry spells of similar duration could be characterized by different water stress as a  
111 function of the differences in the AED as suggested by drought indices using precipitation and  
112 the AED for calculations (Beguiría et al., 2014, Manning et al., 2018). AED can be calculated  
113 using meteorological data from different approaches such the potential evaporation  
114 (McMahon et al., 2013) or the reference evapotranspiration ( $ET_0$ ) (Allen et al. 1998) but it can  
115 be also measured by means of Evaporation Pans. In the Mediterranean region different studies  
116 have shown an increase in the AED in recent decades (Vicente-Serrano et al., 2014) that has  
117 increased drought severity (Vicente-Serrano et al., 2014a, Stagge et al., 2017). It is unclear  
118 how these trends could affect extreme dry spell severity.

119

120 The goal of the present study is to evaluate the influence of different daily precipitation  
121 thresholds to define a dry day on the estimation of seasonal extreme dry spell hazard in the  
122 Mediterranean. The novelty of the approach proposed herein, is to use the AED to identify dry  
123 days prior to the analysis of extreme dry spell risk. Two thresholds to define a dry day are  
124 compared: 1 mm/day, the threshold commonly used in most Mediterranean studies, and a  
125 daily precipitation threshold defined by the AED, thus seasonally and temporally variable.  
126 Two questions are addressed in the present work: (i) are there trends in extreme dry spell  
127 length in Mediterranean region and is the trend detection influenced by the way at which dry  
128 days are defined? (ii) since in most studies a distinction is made between winter and summer  
129 dry spells due to their different characteristics and impacts (Raymond et al. 2018, Trambly  
130 and Hertig, 2018)- is there a different impact on the estimation of extreme dry spells in winter  
131 or summer according to different daily rainfall thresholds?

132

133

134

135

## 136 **2. PRECIPITATION AND REFERENCE EVAPOTRANSPIRATION DATA**

137

138 A network of 160 stations with long daily precipitation records in the Mediterranean region is  
139 considered (see Hertig and Trambly, 2017, Trambly and Hertig, 2018 for more details about  
140 this dataset). Since most stations have almost complete records between 1960 and 2000, it is  
141 the period considered in the present analysis to allow a comparison between stations. The  
142 years with more than 5% missing days have been discarded from subsequent analysis. A  
143 preliminary sensitivity analysis considering different missing day ratios has shown that it does  
144 not impact the results.

145

146 In addition to precipitation data, as a representative and spatially comparable metric of the  
147 AED, the reference evapotranspiration ( $ET_0$ ) from the Climate Research Unit (CRU) dataset  
148 version 4.2 is considered (Harris et al., 2014). Several studies (McVicar et al., 2012a, 2012b,  
149 Todorovic et al., 2013, Vicente-Seranno et al., 2014b, Anabalón and Sharma, 2017)  
150 highlighted the need to consider a physically based  $ET_0$  calculation, such as the FAO-PM, to  
151 account for possible changes in other variables than temperature in the AED and to have an  
152 accurate quantification of the climate change effect on drought (Trenberth et al., 2014).  
153 Reference evapotranspiration is defined as the rate of evapotranspiration, only influenced by  
154 the atmospheric conditions, from a clipped grass surface having 0.12 m height and bulk  
155 surface resistance equal to  $70 \text{ s m}^{-1}$ , an assumed surface albedo of 0.23 and no moisture stress.  
156 In the CRU dataset, the  $ET_0$  is computed from a simplified version of the FAO Penman-  
157 Monteith (FAO-PM) equation (Allen et al. 1998) that uses data of air temperature, sunshine  
158 duration, vapor pressure deficit and a climatology for wind speed. The detail for the  
159 computation is given in Harris et al. (2014). By comparison, Potential Evapotranspiration  
160 (PET) is the evapotranspiration from a given crop surface, requiring the use of crop  
161 coefficients that can vary in time due to the development stage of the vegetation. The use of  
162  $ET_0$  allows the comparison between stations and does not require estimating local crop  
163 coefficients.

164

165 Two different definitions for a dry spell are used in the present work. The first one considers a  
166 dry spell as consecutive days with precipitation below 1 mm. For the second one, the  $ET_0$  is  
167 considered as a threshold to define a dry day when  $P-ET_0 \leq 0$ . In addition, to provide a  
168 measure of rainfall intensity we computed from daily precipitation the Simple Precipitation

169 Intensity Index (SDII), defined as the monthly sum of precipitation during wet days divided  
170 by the number of wet days in the month (expressed as mm/day). It is an interesting metric for  
171 the present dry spells analysis, since the SDII can provide a measure of rainfall intensity that  
172 can be compared with the threshold used to define a dry day during a dry spell.

173

### 174 **3. METHODS**

175

#### 176 **3.1 Statistical tests**

177

178 To test the presence of trends in the different station time series, the non-parametric Mann-  
179 Kendall (Mann, 1945) test was used. Since the presence of autocorrelation in the data could  
180 lead to an increased number of type I errors (Serinaldi et al., 2018), we used the trend-free  
181 pre-whitening method introduced by Yue et al. (2002) and modified according to Serinaldi et  
182 al. (2006). In addition, since the tests are repeated on a large ensemble of stations (160), we  
183 also implemented the false discovery rate (FDR) method of Benjamini and Hochberg (1995)  
184 to distinguish between at-site and regionally significant trends (Wilks, 2018).

185

186 To compare the different extreme dry spells distributions, computed with different definitions  
187 of a dry day, the Anderson Darling test (Scholz and Stephens, 1987, Viglione et al., 2007) is  
188 considered. The test verifies the hypothesis that two independent samples belong to the same  
189 population without specifying their common distribution function. The test statistic measures  
190 the distance between the empirical cumulative distribution functions and places more weight  
191 towards the tail of the distributions, hence making it adapted to the analysis of extreme values.

192

#### 193 **3.2 Distribution fitting**

194

195 To compute the return levels for different extreme dry spell durations, there is the need to fit a  
196 distribution to the samples. No single distribution is commonly applied to extreme dry spell  
197 lengths and also we define differently dry spells than previously (Vicente-Serrano and  
198 Beguería-Portugués, 2003, Lana et al., 2006, Serra et al., 2016). Thus, the GEV, Gamma and  
199 Log normal distribution are first compared to represent extreme dry spells, using the  
200 maximum likelihood estimation method. A split-sample procedure has been implemented to  
201 validate the choice of the distribution. The same procedure as described in Zkhiri et al. (2017)  
202 or Renard et al., (2013) is retained, based on a bootstrap cross-validation. The relative average

203 root mean square error (RRMSE) for the validation samples is used as an evaluation metric to  
204 select the best distribution. The best distribution retained is then used to compute extreme dry  
205 spell quantiles computed with different precipitation thresholds for a dry day.

206

### 207 **3.3 Definition of the seasons**

208

209 The Mediterranean regions are classified as Csa and Csb climate types in the Köppen  
210 classification (Peel et al., 2007), defined as climates with a precipitation deficit during  
211 summer months (when the sub-tropical high pressure belt moves northward and prevent  
212 moisture advection from westerlies). The Mediterranean climate is then characterized by two  
213 contrasted seasons: A summer (dry) season from around April to September and an extended  
214 winter season (wet) from October to March, with most of the precipitation occurring during  
215 this period. Yet the transitional months could vary depending on the location and one single  
216 definition of the Mediterranean seasons is probably not appropriate due to strong North/South  
217 and West/East variations on the beginning/finishing dates for the season of precipitation  
218 deficit. This has been highlighted by the recent study of Raymond et al. (2018). Reiser and  
219 Kutiel (2009) previously observed different lengths for the wet season, (on 40 stations) with  
220 less than 6 months in the south and up to 10 months in the North. Thus, in the present study  
221 we choose to define the season lengths for each station according to an objective criterion,  
222 being the precipitation deficit in summer (ie. the months when  $P-ET_0 = 0$  are defined as the  
223 summer season). Then a clustering approach (Ward, 1963) is used to group stations with a  
224 similar seasonality. The optimal number of clusters is estimated with the gap statistic  
225 (Tibshirani et al. 2001) and silhouette plot (Kaufman and Rousseeuw, 1990).

226

## 227 **4. RESULTS**

228

### 229 **4.1 Climatic trends**

230

231 There are increasing trends in  $ET_0$  in West/Central Mediterranean stations, mostly during  
232 summer months and to a lesser extent in March for the Iberian Peninsula (Figure 1). These  
233 monthly trends imply an increase of  $ET_0$  at the annual scale for these stations (Spain, South  
234 France, Italy, East Algeria and Tunisia). When tested on the annual total  $ET_0$ , the trends are  
235 regionally significant at 67 stations, located in south France, Spain, Middle East, Tunisia and  
236 Algeria, Italy and the Adriatic. With both thresholds 1mm or  $Et_0$  to define a dry days (named

237 thereafter respectively  $S1$  and  $SET_0$ ), there is an increase in the frequency of dry days in  
238 February and March, centered on the stations in Spain, Portugal and South France (Figure 2  
239 and Figure 3). The spatial patterns of detected trends are similar with the two thresholds but  
240 the increase is more pronounced, with more regionally significant trends, when using  $ET_0$  as  
241 threshold for dry days. Yet, the increase in  $ET_0$  during summer months does not imply an  
242 increase in the frequency of dry days during this season when considering  $ET_0$  to define a dry  
243 day. On the contrary, in March the increase in  $Et_0$  in the Western Mediterranean is  
244 accompanied by an increased frequency of dry days. The monthly  $ET_0$  during winter months  
245 lies in the interval 0.5 to 2 mm for all stations, when for the summer daily  $ET_0$  ranges between  
246 3 mm and 7 mm/day.

247

248 Additionally, we tested the trends for the Simple Daily Intensity Index (SDII). The results  
249 indicate a decrease of SDII for a few stations, in particular in February in South France, but  
250 overall these trends are not regionally significant. An interesting feature is illustrated in  
251 Figures 4 and 5: the ratio between  $ET_0$  and the SDII during June, July and August show a  
252 remarkable North/South difference: In the south the average precipitation amounts during  
253 summer stay below evapotranspiration during rainfall events. During the summer months  
254 there is also a large variability and the ration is often exceeding 1. This implies that, on  
255 average, precipitation events will not be able to end a succession of dry days and this  
256 characteristic favor very long dry spells during summer. On the opposite, in the north the  
257 average precipitation during an event stay above  $ET_0$ .

258

#### 259 **4.2 Seasonal comparison of extreme dry spells**

260

261 As mentioned in the previous section and in section 3.3, there is a different seasonal behavior  
262 of dry spells between winter and summer months. In addition, several studies have shown that  
263 long dry spells during the winter season may have more severe consequences than those  
264 occurring during summer. This justifies a seasonal analysis of the extreme dry spells defined  
265 according to different dry day definitions. Nevertheless, prior to a seasonal comparison, a  
266 classification of stations according to monthly net precipitation ( $P - ET_0$ ) has been performed  
267 as explained in section 3.3. The classification shows a marked distinction between two  
268 clusters as shown in Figure 6, very similar to the spatial patterns of Figure 5, with northern  
269 stations (approximately north of  $40^\circ N$ ) with a precipitation deficit from April to September  
270 and southern stations with a precipitation deficit from March to October.



271

272 Then for each season and each year, the maximum dry spell lengths have been extracted at the  
273 different stations according to two thresholds for a dry day: 1 mm and  $ET_0$  (thereafter the  
274 extreme dry spells derived from the two thresholds are noted S1 and  $SET_0$ ). Then, the  
275 Anderson-Darling test has been applied between summer and winter maxima. For S1, the test  
276 rejects the null hypothesis at the 5% significance level for 135 stations. The remaining 25  
277 stations where the winter and summer distributions are found similar are located in northern  
278 Mediterranean countries such as France (including Perpignan, Nîmes, Orange), Spain  
279 (Huesca, Valencia, Soria, Vallalolid), Italy (Ferrara, Genoa), Croatia (Gospic, Zavizan). For  
280  $SET_0$ , the test rejects the null hypothesis for 155 stations (except Mantova, Verona, Reijka,  
281 Milan, Mons). This indicates that the majority of stations the winter and summer distributions  
282 of extreme dry spell are different whatever the threshold considered for a dry day. Indeed, the  
283 extreme dry spells tends to be longer in summer than in winter for all stations and this feature  
284 accentuates with increased aridity. This result justifies the need to perform a seasonal analysis  
285 when considering extreme dry spells risk.

286

287 Finally, the same Anderson-Darling test has been applied for a given season between extreme  
288 dry spells computed with the threshold 1 mm (S1) and extreme dry spells computed with  $ET_0$   
289 ( $SET_0$ ). As shown in Figure 7, there are strong differences in summer when extreme dry spells  
290 are computed with the dry day threshold 1 mm or  $ET_0$ . For most stations, the two distributions  
291 are significantly different at the 5% level. On the opposite, for winter it can be assumed that  
292 extreme dry spells computed with 1mm or the  $ET_0$  are stemming from the same distribution.  
293 This is due to the fact that during winter the AED is low and close to the value 1mm.

294

### 295 **4.3 Return levels of extreme dry spells**

296

297 Prior to the fitting of statistical distributions, there is the need to verify the hypothesis of  
298 stationarity. Overall, there are not significant trends in extreme dry spells duration, neither for  
299 winter or summer, with the threshold 1 mm or  $ET_0$  to define dry days. This finding is quite  
300 surprising since there is an increase of  $ET_0$  in summer and one would expect an increase in  
301 dry spells when considering  $ET_0$  as daily rainfall threshold. As elements of explanations, it  
302 was shown before that the increase of  $ET_0$  is focused only in the months of June, July and  
303 August (see Figure 1). Furthermore, two extreme cases are exemplified here, Montpellier in  
304 the North (783mm/year on average) and Gafsa in the South (168mm/year). In Figure 8 the

305 daily rainfall for a random year (1998) is plotted together with  $ET_0$  at the beginning of the time  
306 period (1960), in 1998 and for the end of the time period (2000). In Gafsa or Montpellier, the  
307 increase of  $ET_0$  in summer is not high enough to exceed daily events of intense precipitation  
308 (often thunderstorms). In the south, the  $ET_0$  is already higher than most of precipitation events  
309 (e.g. Figure 5), except for a few high-intensity events above  $ET_0$ . Still, the increase in  $ET_0$   
310 does not impact the longest dry spells sequences as indicated by the trend analysis.

311  
312 The GEV, Log Normal and Gamma distributions have been compared to fit extreme dry  
313 spells. The results are illustrated in Figure 9 for 10 stations located in different regions having  
314 long records and very little or no missing data over their full records. For both S1 and S  $ET_0$ ,  
315 the Gamma distribution outperforms the GEV or Log-Normal since it provides lower mean  
316 RRMSE values in validation results on independent samples. Quantiles corresponding to a 20-  
317 year return period have been computed from a Gamma distribution for each station and each  
318 season, according to the two different thresholds for dry days. A relative difference between  
319 the two quantiles has been computed, taking the S1 quantile as reference, since it is up to now  
320 the most widely used approach to estimate dry spell durations. Results, shown in Figure 10,  
321 indicate a strong underestimation of extreme dry spells during summer when using the fixed  
322 threshold of 1 mm. This underestimation is on average -29%, but only 4% in winter. This  
323 result question the use of a fixed threshold of 1 mm during summer, since it is not  
324 representative of the real amount of water available on the ground due to evaporation. On the  
325 contrary, focusing on winter only with a fixed threshold 1 mm does not induce strong  
326 uncertainties due to the low AED during this season.

327

## 328 **5. Discussion**

329

330 The results obtained in the present work indicate the need to consider AED in particular  
331 during summer months to define a dry day, which is probably more realistic than with a fixed  
332 threshold of 1 mm. In more arid environments than the Mediterranean region, such as the  
333 Middle East and North Africa regions, it would mean that the analysis of dry spell could be  
334 strongly impacted whether the AED is taken into account or not. It implies that it necessary to  
335 re-define appropriate thresholds to define dry days according to different regions. By  
336 comparison with other drought indices, such as the SPI or SPEI that are averaged on a  
337 monthly basis for different time horizons (Mukherjee et al., 2018), the explicit consideration  
338 of extreme dry spells could be an interesting way of relating dry spells to impacts. Indeed, dry

339 spell durations computed with dry day thresholds representative of real climate conditions  
340 could be directly related to plants phenology to study the drought impacts for different  
341 agricultural productions. This new definition of dry spells, considering a time varying  
342 threshold based on AED, is a departure from the classical viewpoint of a meteorological  
343 drought index since it tries to relate the atmospheric and ground conditions to assess the  
344 amount of water that is actually available for plants or water use. In that sense, it relates to the  
345 SPEI but tailored at the scale of individual dry spell events.

346

347 The results of the present study rely on the estimation of AED with reference  
348 evapotranspiration. Still more reliable than  $ET_0$  estimates from temperature only, the FAO-PM  
349 equation may not be fully representative of the AED at the different locations considered.  
350 McMahon et al. (2013) provided a synthesis of the uncertainties related to the estimation of  
351 the AED: data limitations such as wind or humidity, which are not always available for all  
352 gauging stations, but also the fact that reference evapotranspiration rely on an hypothetical  
353 grass surface that may not be representative of the real land cover at the different stations  
354 during the different seasons of the year. Indeed, it is possible to derive the potential  
355 evapotranspiration from reference evapotranspiration using crop coefficients representative of  
356 the real ground conditions. These changes in land cover could modulate the AED between  
357 different locations. As an alternative, it could be possible to use actual evapotranspiration but  
358 since it cannot be measured (at least for large areas) this would require the use of land surface  
359 modelling. However, there are differences in actual evapotranspiration computed from  
360 different land surface models, due to different parametrization, climate forcing, and  
361 representation of the semi-arid surface processes (Quintana-Seguí et al., 2019). Finally, it  
362 must be stressed that the estimation of AED in the Mediterranean for a long term perspective  
363 and climate change impact studies, must face several sources of uncertainties, such as land  
364 cover changes, forest fires that could induce drastic changes in surface processes, water soil  
365 conditions influenced by human activity and irrigation, among others.

366

## 367 **6. Conclusions**

368

369 In this study, the extreme dry spells defined either with a fixed dry-day threshold (1 mm/day)  
370 or with a time-varying threshold estimated from reference evapotranspiration ( $ET_0$ ) have been  
371 compared for a large data base of 160 rain gauges covering the whole Mediterranean basin.  
372 An increase in  $ET_0$  is found for summer months (JJA) mainly in the central/western parts of

373 the Mediterranean basin. The reported trends for summer are consistent with previous studies  
374 in Spain, driven by a decrease in relative humidity and an increase of maximum temperature  
375 (Vicente-Serrano et al., 2014a, 2014b). Also increases in the number of dry days are found for  
376 February and March at a large number of stations, either with 1mm or  $ET_0$  to define a dry day.  
377 However, no trends are detected for extreme dry spell lengths when using both thresholds to  
378 define a dry day. The distributions of extreme dry spells have been found to be different for  
379 winter and summer, with much longer extreme dry spells during summer. Also, for many  
380 locations a stronger variability in winter extreme dry spells became apparent. These results  
381 highlight the need of a seasonal analysis to avoid the misestimating the extreme dry spells  
382 risk. Despite the climatic trends on precipitation and evapotranspiration, there are no  
383 significant trends in seasonal extreme dry spells risk in most areas. The frequency analysis of  
384 seasonal extreme dry spells reveals that using a fixed threshold set to 1 mm implies an  
385 underestimation of extreme dry spells risk by comparison to a time-varying threshold  
386 representing evapotranspiration during the extended summer season. The time-varying  
387 thresholds appear a more relevant choice representative of real atmospheric conditions, but  
388 this needs to be further confirmed by relating extreme dry spells computed with this new  
389 approach and drought impacts in different sectors (agriculture, vegetation, etc.). As a  
390 conclusion, we stress the need to account for the atmospheric water demand when analyzing  
391 dry spells in particular if the goal is to relate them with agricultural impacts.

392

### 393 **Acknowledgements**

394

395 This work is a contribution to the HYdrological cycle in The Mediterranean EXperiment  
396 (HyMeX) program, through INSU-MISTRALS support for the studentship of Pauline  
397 Rivoire. The results have been obtained using the R packages: extRemes, MASS, kSamples,  
398 randtests, stats, zyp.

399

400

### 401 **References**

402

403 Allen, R.G., Pereira, L.S., Raes, D., Smith, M.: Crop evapotranspiration, guidelines for  
404 computing crop water requirements, Irrigation and drain, Paper No 56 FAO, Rome, Italy,  
405 2008.

406

407 Allen, C. D., Breshears, D. D., McDowell, N. G.: On underestimation of global vulnerability  
408 to tree mortality and forest die-off from hotter drought in the Anthropocene, *Ecosphere*, 6(8),  
409 doi:10.1890/ES15-00203.1, 2015.

410

411 Anderegg, W. R. L., Klein, T., Bartlett, M., Sack, L., Pellegrini, A. F. A., Choat, B., Jansen, S.:  
412 Meta-analysis reveals that hydraulic traits explain cross-species patterns of drought-induced  
413 tree mortality across the globe, *Proc. Natl. Acad. Sci. U. S. A.*, 113(18), 5024–5029,  
414 doi:10.1073/pnas.1525678113, 2016.

415

416 Anabalón, A., Sharma, A.: On the divergence of potential and actual evapotranspiration  
417 trends: An assessment across alternate global datasets, *Earth's Future*, 5, 905-917.  
418 doi:10.1002/2016EF000499, 2017.

419

420 Beguería, S., Vicente-Serrano, S. M., Reig, F., Latorre, B.: Standardized precipitation  
421 evapotranspiration index (SPEI) revisited: parameter fitting, evapotranspiration models, tools,  
422 datasets and drought monitoring, *Int. J. Climatol.*, 34, 3001–3023, 2014.

423

424 Benjamini, Y., Hochberg, Y.: Controlling the false discovery rate: A practical and  
425 powerful approach to multiple testing, *J. Roy. Stat. Soc. B*, 57, 289–300, 1995.

426

427 Douguedroit, A.: The variations of dry spells in marseilles from 1865 to 1984, *J. Climatol.*, 7,  
428 541–551, 1987.

429

430 Greve, P., Orlowsky, B., Mueller, B., Sheffield, J., Reichstein, M., Seneviratne, S. I.: Global  
431 assessment of trends in wetting and drying over land, *Nat. Geosci.*, 7(10), 716–721,  
432 doi:10.1038/NGEO2247, 2014.

433

434 Harris, I., Jones, P., Osborn, T., Lister, D.: Updated high-resolution grids of monthly climatic  
435 observations – the CRU TS3.10 Dataset, *Int. J. Climatol.*, 34: 623-642. doi:10.1002/joc.3711,  
436 2014.

437

438 Haylock, M.R., Hofstra, N., Klein Tank, A.M.G. , Klok, E.J., Jones P.D., New, M.: A  
439 European daily high-resolution gridded dataset of surface temperature and precipitation, *J.*  
440 *Geophys. Res (Atmospheres)*, 113, D20119, doi:10.1029/2008JD10201, 2008.

441  
442 Hertig, E., Trambly, Y.: Regional downscaling of Mediterranean droughts under past and  
443 future climatic conditions, *Global and Planetary Change*, 151, 36-48, 2017.  
444  
445 Hoerling, M., Eischeid, J., Perlwitz, J., Quan, X., Zhang, T., Pegion, P.: On the increased  
446 frequency of Mediterranean drought, *J. Clim.*, 25, 2146–2161, 2012.  
447  
448 Kaufman L., Rousseeuw P.J.: *Finding Groups in Data: An Introduction to Cluster Analysis*,  
449 Hoboken, NJ: John Wiley & Sons, New York., 1990.  
450  
451 Lana, X., Martínez, M. D., Burgueño, A., Serra, C., Martín-Vide, J. and Gómez, L.:  
452 Distributions of long dry spells in the Iberian peninsula, years 1951–1990, *Int. J. Climatol.*,  
453 26: 1999–2021. doi:10.1002/joc.1354, 2006.  
454  
455 Lobell, D. B. and Field, C. B.: Global scale climate–crop yield relationships and the impacts  
456 of recent warming, *Environ. Res. Lett.*, 2(1), 014002, doi:10.1088/1748-9326/2/1/014002,  
457 2007.  
458  
459 Lobell, D. B., Hammer, G. L., Chenu, K., Zheng, B., Mclean, G. and Chapman, S. C.: The  
460 shifting influence of drought and heat stress for crops in northeast Australia, *Glob. Chang.*  
461 *Biol.*, 21(11), 4115–4127, doi:10.1111/gcb.13022, 2015.  
462  
463 Lorenzo-Lacruz, J., Vicente-Serrano, S. M., González-Hidalgo, J. C., López-Moreno, J. I. and  
464 Cortesi, N.: Hydrological drought response to meteorological drought in the Iberian  
465 Peninsula, *Clim. Res.*, 58(2), doi:10.3354/cr01177, 2013.  
466  
467 Naumann, G., Alfieri, L., Wyser, K., Mentaschi, L., Betts, R. A., Carrao, H., et al.: Global  
468 changes in drought conditions under different levels of warming. *Geophysical Research*  
469 *Letters*, 45, 3285–3296. <https://doi.org/10.1002/2017GL076521>, 2018.  
470  
471 Mann, H. B.: Nonparametric tests against trend, *Econometrica*, 13, 245– 259, 1945.  
472

473 Manning, C., Widmann, M., Bevacqua, E., Van Loon, A.F., Maraun, D., and Vrac, M.: Soil  
474 Moisture Drought in Europe: A Compound Event of Precipitation and Potential  
475 Evapotranspiration on Multiple Time Scales, *J. Hydrometeor.*, 19, 1255–1271, 20180  
476

477 Mariotti, A., Dell'Aquila, A.: Decadal climate variability in the Mediterranean region: roles of  
478 large-scale forcings and regional processes, *Clim. Dyn.* 38, 1129–1145, 2012.  
479

480 McMahon, T. A., Peel, M. C., Lowe, L., Srikanthan, R., and McVicar, T. R.: Estimating  
481 actual, potential, reference crop and pan evaporation using standard meteorological data: a  
482 pragmatic synthesis, *Hydrol. Earth Syst. Sci.*, 17, 1331-1363, [https://doi.org/10.5194/hess-17-](https://doi.org/10.5194/hess-17-1331-2013)  
483 1331-2013, 2013.  
484

485 McVicar, T. R., Roderick, M. L., Donohue, R. J., Li, L.T., VanNiel, T. G., Thomas, A.,  
486 Grieser, J., Jhajharia, D., Himri, Y., Ma-howald, N.M., Mescherskaya, A.V., Kruger, A.C.,  
487 Rehman,S., Dinpashoh, Y.: Global review and synthesis of trends in observed terrestrial  
488 near-surface wind speeds: Implications for evaporation, *J. Hydrol.*, 416–417, 182–205,  
489 2012a.  
490

491 McVicar, T.R., Roderick, M. L., Donohue, R.J., Van Niel, T.G.: Less bluster ahead?  
492 Overlooked ecohydrological implications of global trends of terrestrial near-surface wind  
493 speeds, *Ecohydrology*, 5, 381–388, 2012b.  
494

495 Mishra, A.K., Singh, V.P.: A review of drought concepts. *J. Hydrol.* 391, 202–216, 2010.  
496

497 Mathugama, S. C., Peiris, T. S. G.: Critical Evaluation of Dry Spell Research, *Int. J. Basic*  
498 *Appl. Sci.*, 11, 153–160, 2011.  
499

500 Mukherjee, S., Mishra, A. Trenberth, K. E.: Climate Change and Drought: a Perspective on  
501 Drought Indices, *Curr. Clim. Chang. Reports*, 4(2), 145–163, doi:10.1007/s40641-018-0098-  
502 x, 2018.  
503

504 Páscoa, P., Gouveia, C. M., Russo, A. Trigo, R.M.: The role of drought on wheat yield  
505 interannual variability in the Iberian Peninsula from 1929 to 2012, *Int. J. Biometeorol.*, 61(3),  
506 439–451, doi:10.1007/s00484-016-1224-x, 2017.

507  
508 Peel, M. C., Finlayson, B. L., McMahon, T.A.: Updated world map of the Köppen-Geiger  
509 climate classification, *Hydrol. Earth Syst. Sci.*, 11, 1633-1644, [https://doi.org/10.5194/hess-](https://doi.org/10.5194/hess-11-1633-2007)  
510 11-1633-2007, 2007.  
511  
512 Quintana-Seguí, P., Barella-Ortiz, A., Regueiro-Sanfiz, S. and Miguez-Macho G.: The Utility  
513 of Land-Surface Model Simulations to Provide Drought Information in a Water Management  
514 Context Using Global and Local Forcing Datasets, *Water Resources Management*,  
515 <https://doi.org/10.1007/s11269-018-2160-9>, 2019.  
516  
517 Raymond, F., Ullmann, A., Camberlin, P., Drobinski, P., Chateau Smith C., 2016. Extreme dry  
518 spell detection and climatology over the Mediterranean Basin during the wet season,  
519 *Geophys. Res. Lett.*, 43, 7196–7204, doi:10.1002/2016GL069758.  
520  
521 Raymond F., Ullmann A., Camberlin P., Oueslati B., Drobinsky P.: Atmospheric conditions  
522 and weather regimes associated with extreme winter dry spells over the Mediterranean basin,  
523 *Climate Dynamics* 50, 4437-4453. doi:10.1007/s00382-017-3884-6, 2018.  
524  
525 Reiser H., Kutiel H.: Rainfall uncertainty in the Mediterranean: definition of the daily rainfall  
526 threshold (DRT) and the rainy season length (RSL), *Theor. Appl. Climatol.* 97: 151–162,  
527 2009.  
528  
529 Renard, B., Kochanek, K., Lang, M., Garavaglia, F., Paquet, E., Neppel, L., Najib, K.,  
530 Carreau, J., Arnaud, P., Aubert, Y., Borchi, F., Soubeyroux, J.M., Jourdain S., Veysseire J.M.,  
531 Sauquet E., Cipriani, T., Auffray, A.: Data-based comparison of frequency analysis methods: a  
532 general framework, *Water Resour Res* 49:825–843, 2013.  
533  
534 Serra C., Lana X., Burgueno A., Martinez M.D.: Partial duration series distributions of the  
535 European dry spell lengths for the second half of the twentieth century, *Theoretical and Applied*  
536 *Climatology* 123, 63-81, 2016.  
537  
538 Scholz, F. W., Stephens, M. A.: K-Sample Anderson–Darling Tests, *Journal of the American*  
539 *Statistical Association*, 82:399, 918-924, 1987.  
540



541 Serinaldi, F., Kilsby, C.: The importance of prewhitening in change point analysis under  
542 persistence, *Stochastic Environmental Research and Risk Assessment*, 30(2), 763-777, 2016.  
543

544 Serinaldi, F., Kilsby, C.G., Lombardo, F.: Untenable non-stationarity: An assessment  
545 of the fitness for purpose of trend tests in hydrology, *Adv. Water Resour.*, 111,  
546 132–155, <https://doi.org/10.1016/j.advwatres.2017.10.015>, 2018.  
547

548 Sivakumar, M.V.K.: Empirical analysis of dry spells for agricultural applications in West  
549 Africa. *J Climate* 5:532–540, 1992.  
550

551 Stage, J.H., Kingston, L. M. Tallaksen, Hannah, D.M.: Observed drought indices show  
552 increasing divergence across Europe. *Sci. Rep.*, 7, 4045, [https://doi.org/10.1038/s41598-017-](https://doi.org/10.1038/s41598-017-14283-2)  
553 [14283-2](https://doi.org/10.1038/s41598-017-14283-2), 2017.  
554

555 Tibshirani, R., G. Walther, Hastie T.: Estimating the number of clusters in a data set via the  
556 gap statistic, *Journal of the Royal Statistical Society: Series B.*, 63(2), 411–423, 2001.  
557

558 Todorovic, M, Karic, B, Pereira, L.S.: Reference evapotranspiration estimate with limited  
559 weather data across a range of Mediterranean climates, *J. Hydrol.*, 481, 166–176, 2013.  
560

561 Trambly, Y., Hertig, E.: Modelling extreme dry spells in the Mediterranean region in  
562 connection with atmospheric circulation. *Atmospheric Research*, 202, 40-48, 2018.  
563

564 Trenberth, K. E., Dai, A., van der Schrier, G., Jones, P. D., Barichivich, J., Briffa, K. R. and  
565 Sheffield, J.: Global warming and changes in drought, *Nat. Clim. Chang.*, 4, 17,  
566 <http://dx.doi.org/10.1038/nclimate2067>, 2014.  
567

568 Vicente-Serrano, S. M., Beguería-Portugués, S.: Estimating extreme dry-spell risk in the  
569 middle Ebro valley (northeastern Spain): a comparative analysis of partial duration series with  
570 a general Pareto distribution and annual maxima series with a Gumbel distribution, *Int. J.*  
571 *Climatol.*, 23: 1103–1118, 2003.  
572

573 Vicente-Serrano, S. M., C. Azorin-Molina, A. Sanchez-Lorenzo, J. Revuelto, E.  
574 Morán-Tejeda, J. I. López-Moreno, Espejo F.: Sensitivity of reference evapotranspiration to

575 changes in meteorological parameters in Spain (1961–2011), *Water Resour. Res.*, 50, 8458–  
576 8480, doi: 10.1002/2014WR015427, 2014a.

577

578 Vicente-Serrano, S.M., Azorin-Molina, C., Sanchez-Lorenzo, A., Revuelto, J., López-Moreno,  
579 J.I., González-Hidalgo, J.C., Espejo, F.: Reference evapotranspiration variability and trends in  
580 Spain, 1961–2011. *Global and Planetary Change*, 121, 26–40, 2014b.

581

582 Vicente-Serrano, S.M., Lopez-Moreno, J.I., Beguería, S., Lorenzo-Lacruz, J., Sanchez-  
583 Lorenzo, A., García-Ruiz, J.M., Azorin-Molina, C., Tejeda-Moran, E., Revuelto, J., Trigo, R.,  
584 Coelho, F., Espejo, F.: Evidence of increasing drought severity caused by temperature rise in  
585 Southern Europe. *Environ. Res. Lett.*, 9 (4), 044001. [http://dx.doi.org/10.1088/1748-  
586 9326/9/4/044001](http://dx.doi.org/10.1088/1748-9326/9/4/044001), 2014c.

587

588 Vicente-Serrano, S.M., Van der Schrier, G., Beguería, S., Azorin-Molina, C., Lopez-Moreno,  
589 J.I.: Contribution of precipitation and reference evapotranspiration to drought indices under  
590 different climates, *J. Hydrol.*, 526, 42-54, 2015.

591

592 Vicente-Serrano, S.M., D.G. Miralles, F. Domínguez-Castro, C. Azorin-Molina, A. El  
593 Kenawy, T.R. McVicar, M. Tomás-Burguera, S. Beguería, M. Maneta, Peña-Gallardo, M.:  
594 Global Assessment of the Standardized Evapotranspiration Deficit Index (SEDI) for Drought  
595 Analysis and Monitoring, *J. Climate*, 31, 5371–5393, 2018.

596

597 Ward, J. H.: Hierarchical Grouping to Optimize an Objective Function, *Journal of the*  
598 *American Statistical Association*, 58 (301): 236–244, 1963.

599

600 Wilks, D.S.: The Stippling Shows Statistically Significant Grid Points: How Research  
601 Results are Routinely Overstated and Overinterpreted, and What to Do about  
602 It, *Bulletin of the American Meteorological Society*, 97(12), 2263-2273, 2016.

603

604 Zkhiri, W., Trambly, Y., Hanich, L., Berjamy, B.: Regional flood frequency analysis in the  
605 high-atlas mountainous catchments of Morocco, *Natural Hazards*, 86(2), 953-967.  
606 <http://dx.doi.org/10.1007/s11069-016-2723-0>, 2017.

607

608

609  
610  
611  
612  
613  
614  
615  
616  
617  
618  
619  
620  
621  
622  
623

## INDEX OF FIGURES

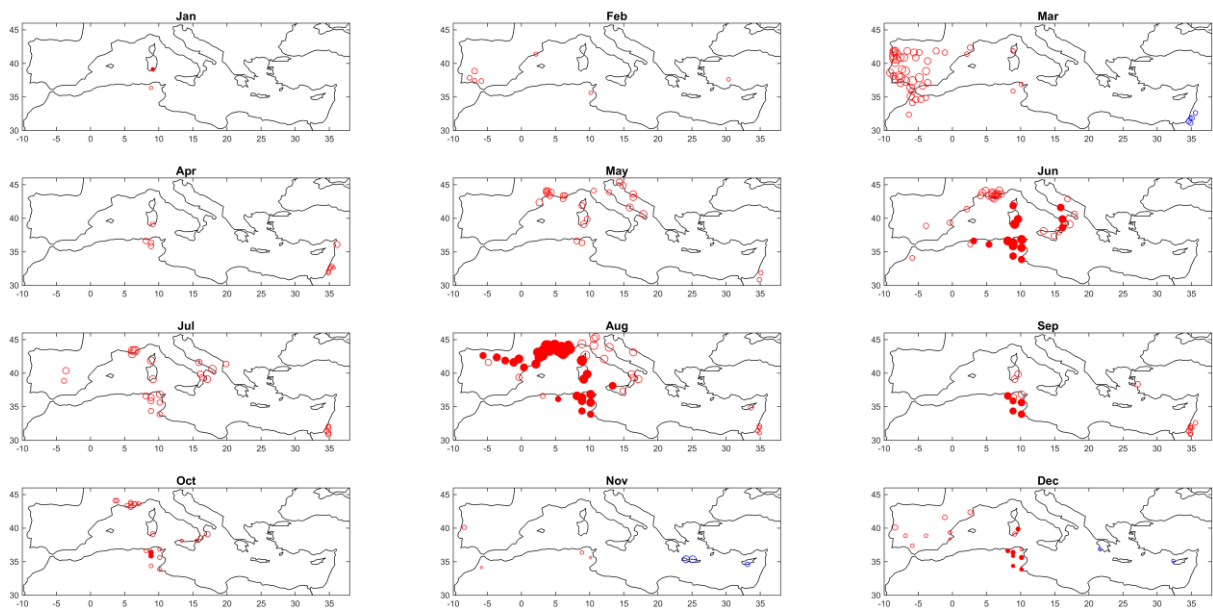

624  
625  
626  
627  
628

Figure 1: Significant trends (5% level) in monthly ET<sub>0</sub>. The size of the circles indicate the magnitude of the trends (red = increasing, blue = decreasing) and the filled circles denote regional significant trends

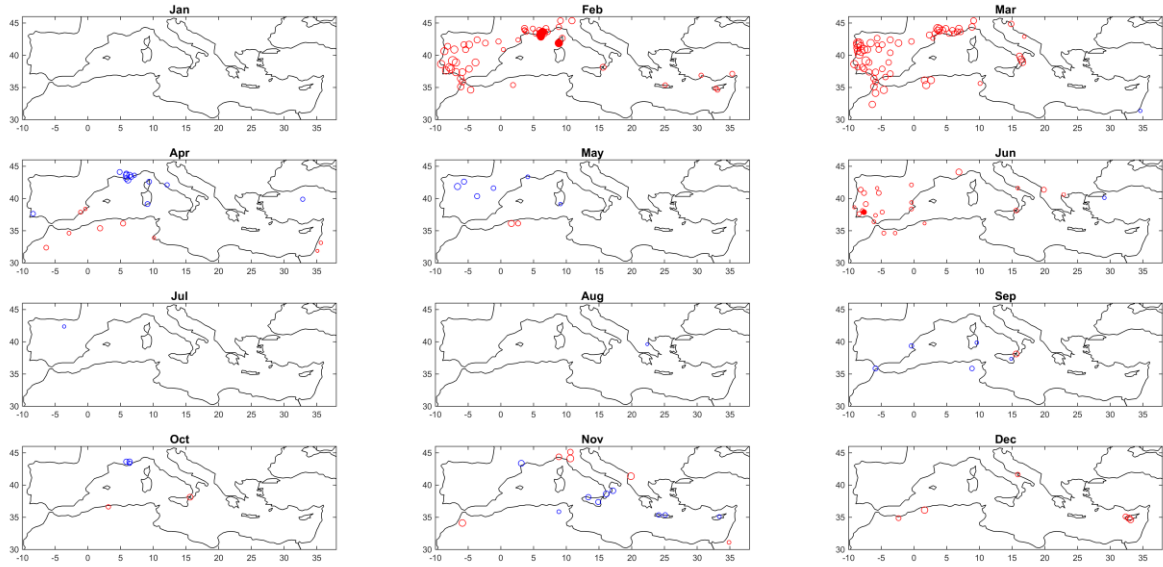

629  
630  
631  
632  
633

Figure 2: Significant trends (5% level) in the frequency of dry days when considering the 1mm threshold to define a dry day. Same as Fig.1 for the display

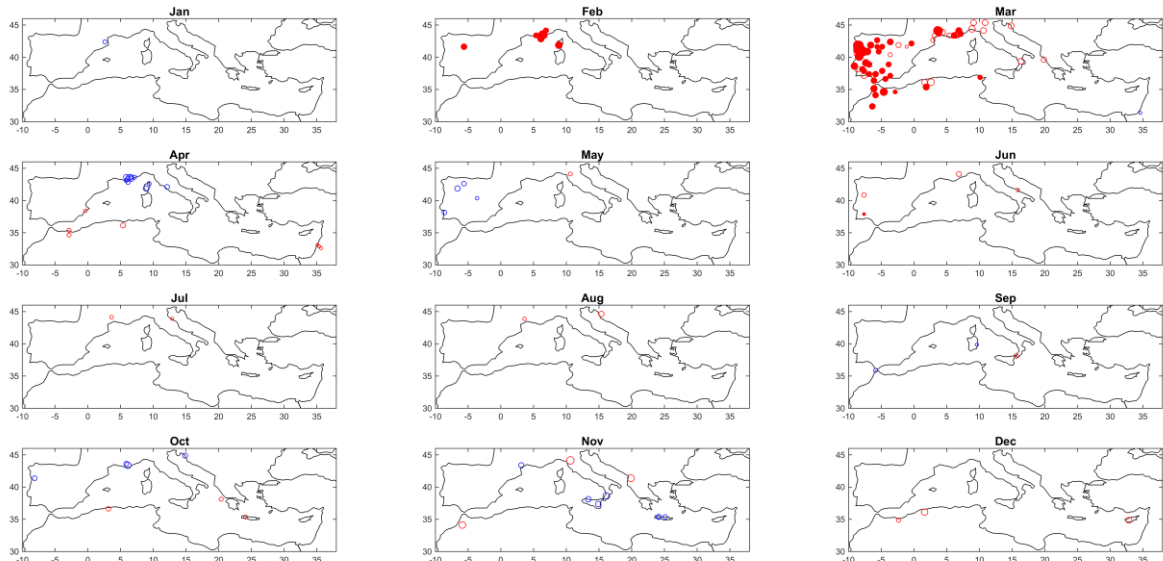

634  
635  
636  
637  
638

Figure 3: Significant trends (5% level) in the frequency of dry days, considering that  $P-ET_0 = 0$  is a dry day. Same as Fig.1 for the display

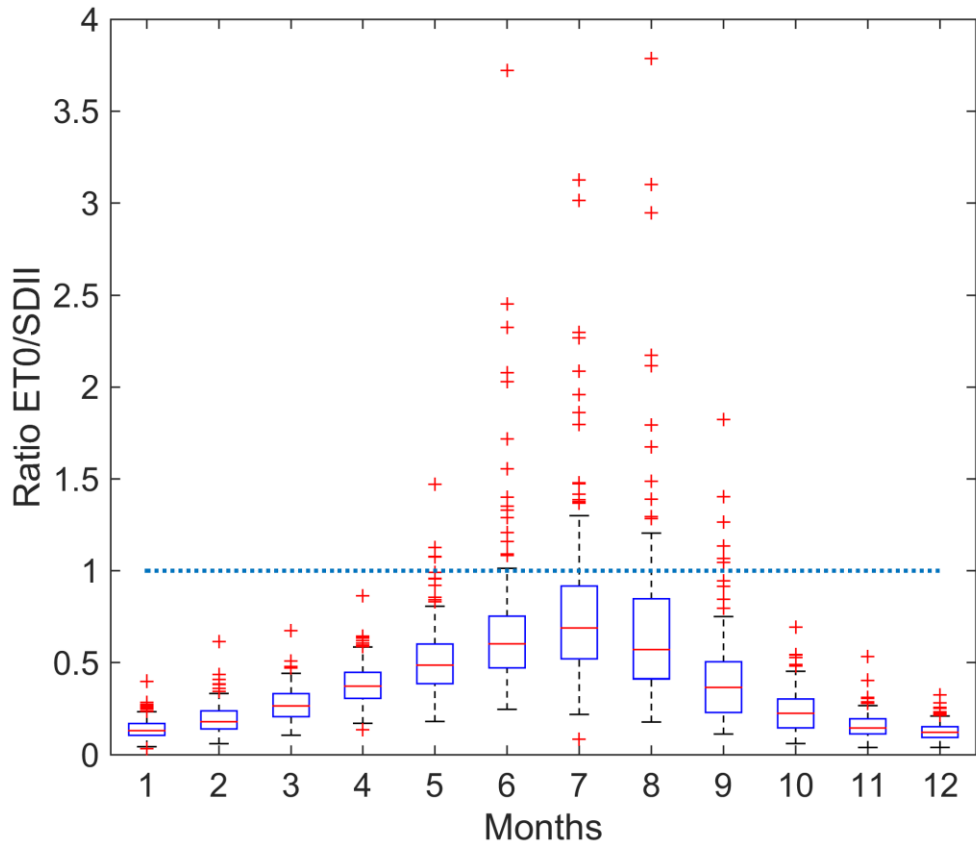

639  
640  
641  
642  
643  
644

Figure 4: Boxplot of the monthly ratios between ET0 and SDII. On each box, the central mark is the median, the edges of the box are the 25th and 75th percentiles, the whiskers extend to +/- 1.5 interquartile range

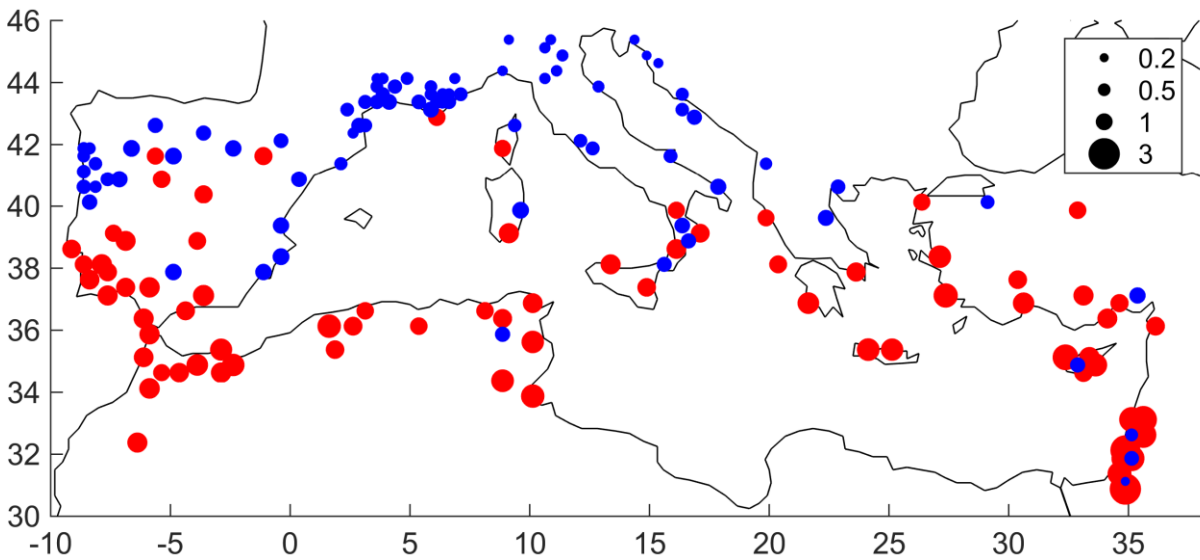

645  
646  
647  
648

Figure 5: Ratio between ET0 and SDII for June, July, August. In blue the stations where the ratio is inferior to 1 ( $SDII > ET_0$ ), in red where the ratio superior to 1 ( $SDII < ET_0$ )

649  
650  
651

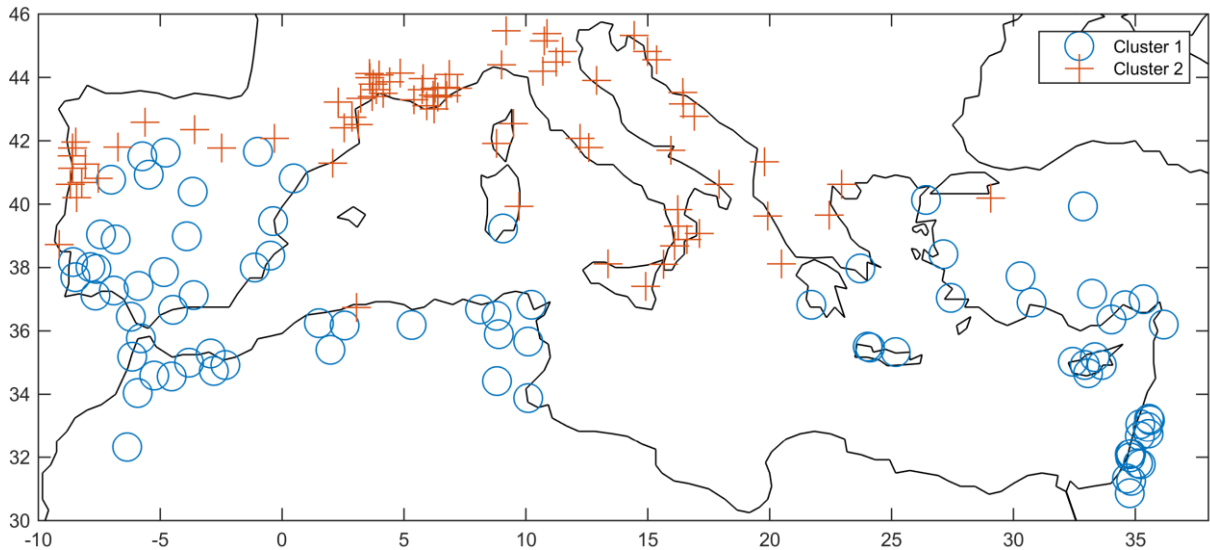

652  
653  
654

Figure 6: Clustering result of monthly net precipitation ( $P-ET_0$ )

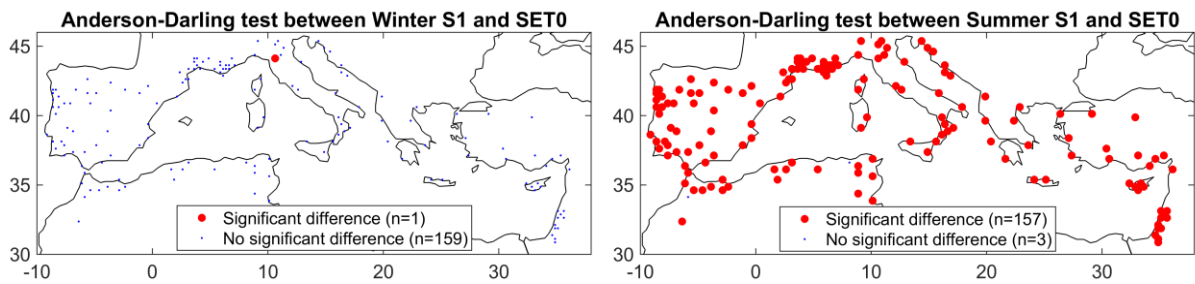

655  
656  
657  
658

Figure 7: Anderson-Darling test results between winter extreme dry spells defined with S1 or SETP (left) and summer extreme dry spells defined with S1 or  $SET_0$  (right)

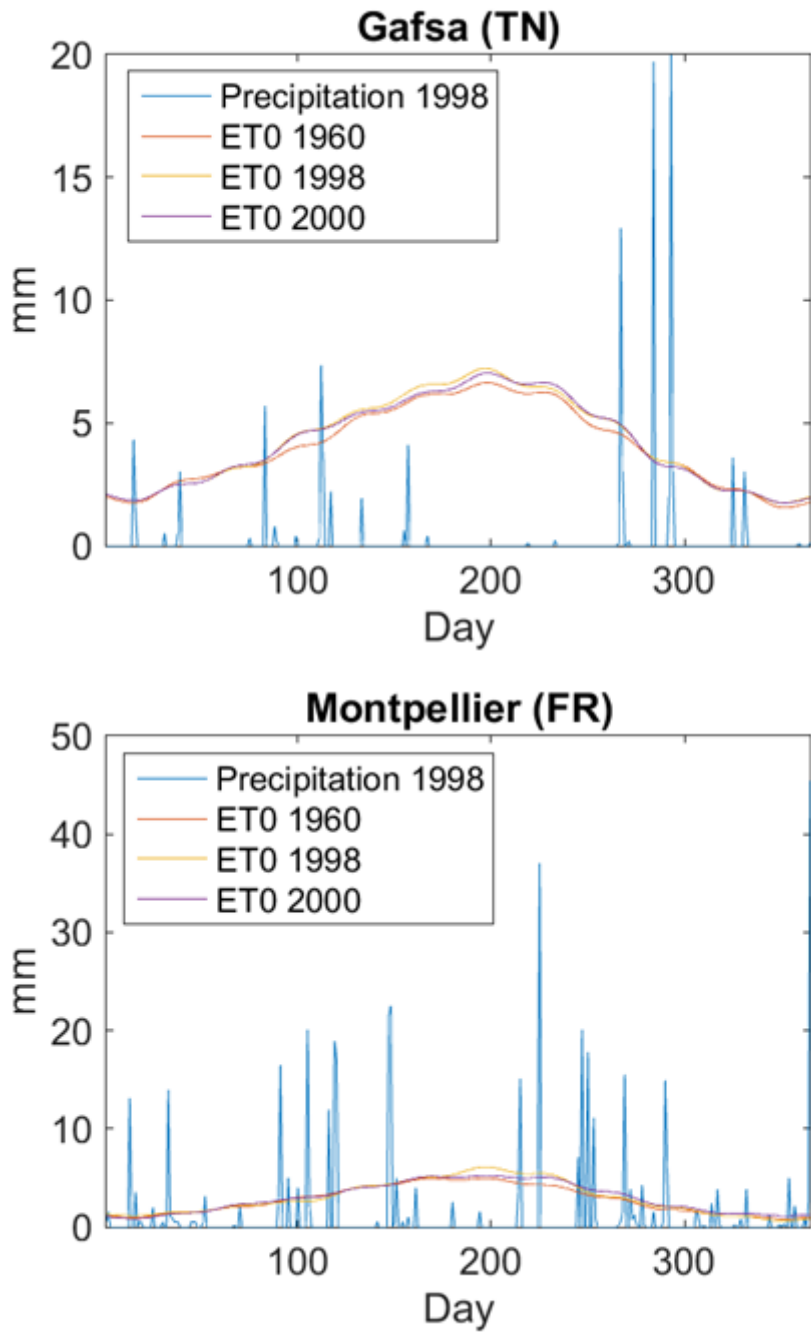

659

660

Figure 8: Daily precipitation for the year 1998 plotted with  $ET_0$  in 1960, 1998 and 2000 for two stations, Gafsa in Tunisia and Montpellier in France

661

662

663

664

665

666

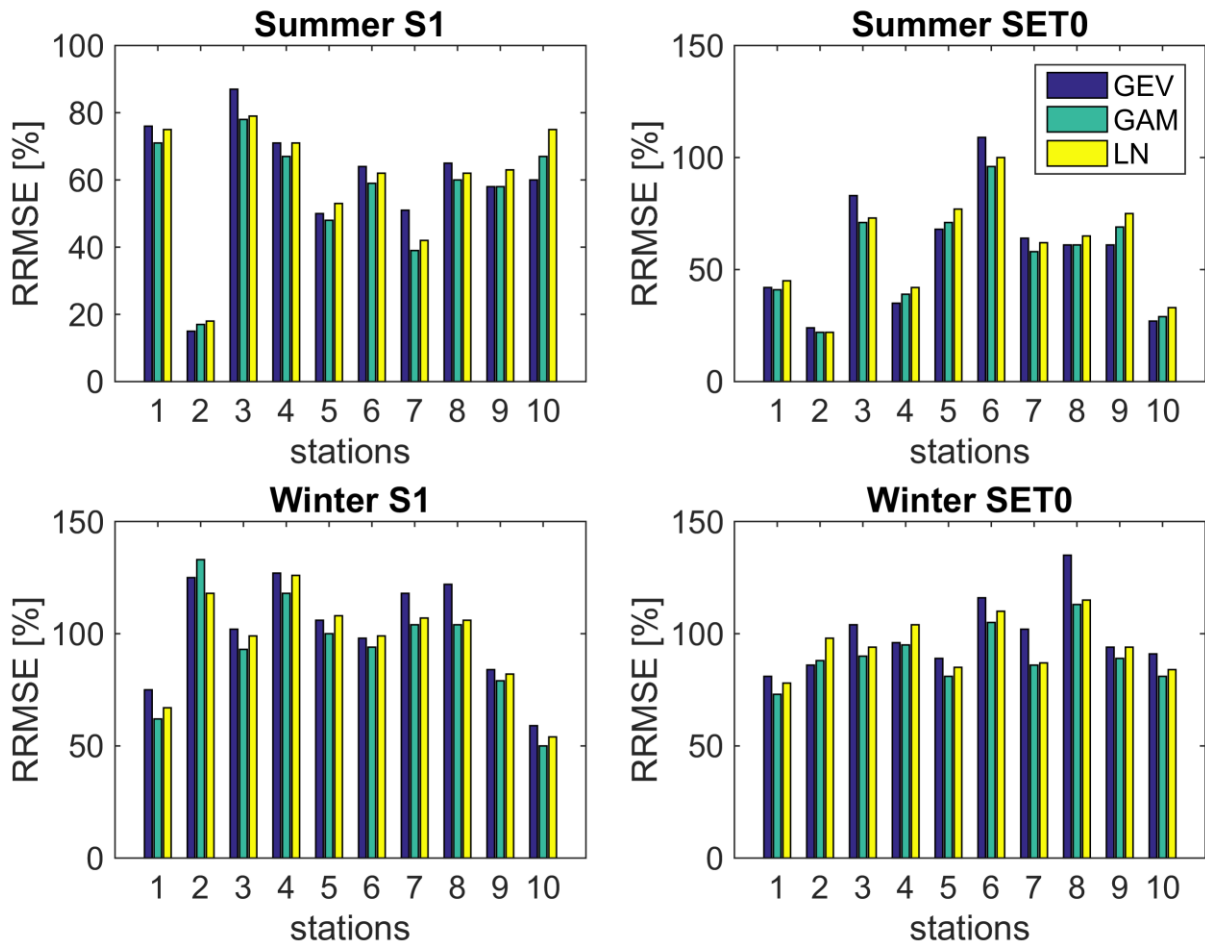

668

669

670 Figure 9: Validation results of the fitting of the GEV, Gamma (GAM) and Log-Normal (LN)  
 671 distributions in terms of relative root mean square error (RRMSE) for 10 representative  
 672 stations (stations numbers: 1-Athens (GR), 2-Tel Aviv (IS), 3-Mantova (IT), 4-Lisboa (PT),  
 673 5-Madrid (ES), 6-Montpellier (FR), 7-Roma (IT), 8-Beni Mellal (MA), 9-Tunis (TN), 10-  
 674 Capo Bellavista (IT))

675

676

677

678

679



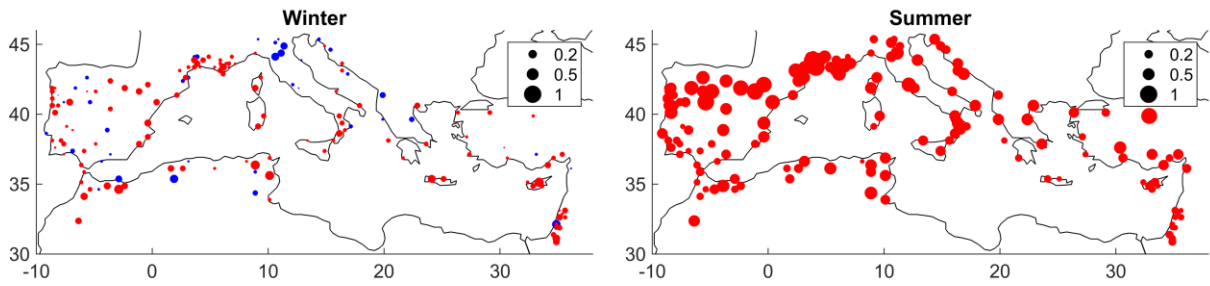

680

681

Figure 10: Relative difference of the 20-year quantile of extreme dry spell computed with

682

SET<sub>0</sub> compared to S1. Red (blue) dots indicate that SET<sub>0</sub> 20-year quantiles are larger

683

(smaller) than those obtained with S1. The larger the bubble, the largest is the difference

684

between S1 and SET<sub>0</sub> (in the legend, 1 = 100% overestimation)

685

686

687
